# Supplementary material for: A metal–organic-framework approach to engineer hollow bimetal oxide microspheres towards enhanced electrochemical performances of lithium storage
Source: Royal Society of Chemistry journal article supplement (doi:10.1039/c8dt04716b), 2019-01-01
Supplement: c8dt04716b1.pdf [file c8dt04716b1.pdf]

## Supporting Information

### **Metal-Organic-Framework Approach to Engineer Hollow Bimetal Oxide Microspheres towards Enhanced Electrochemical Performances of Lithium Storage**

*Weiwei Sun<sup>†</sup>, Si Chen<sup>†</sup>, Yong Wang\**

Department of Chemical Engineering, School of Environmental and Chemical  
Engineering, Shanghai University, 99 Shangda Road, Shanghai, P. R. China, 200444

Corresponding authors: Tel: +86-21-66137723; Fax: +86-21-66137725;

Email address: [yongwang@shu.edu.cn](mailto:yongwang@shu.edu.cn) (Y. Wang)

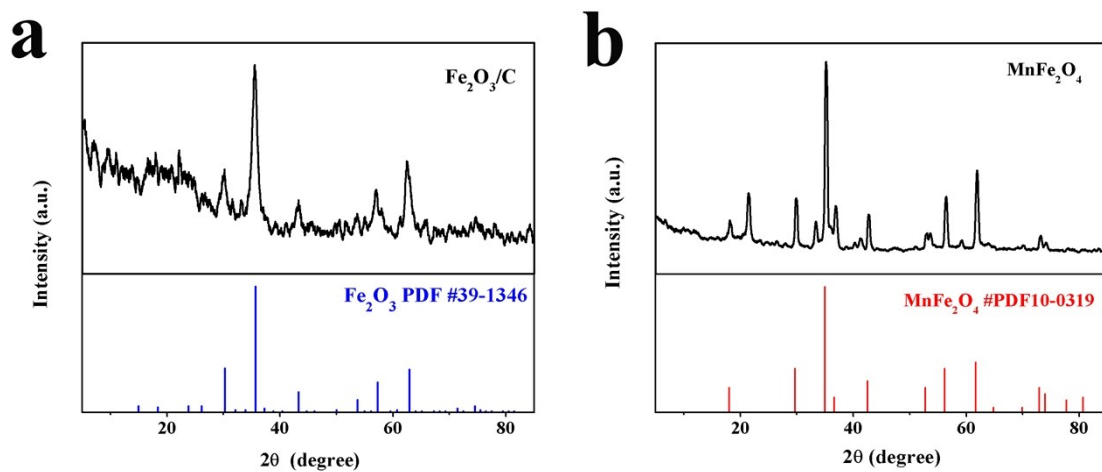

**Fig. S1** XRD patterns of the benchmarked products: (a)  $\text{Fe}_2\text{O}_3/\text{C}$  and (b)  $\text{MnFe}_2\text{O}_4$ . The characteristic peaks in the XRD patterns of  $\text{Fe}_2\text{O}_3/\text{C}$  and  $\text{MnFe}_2\text{O}_4$  are in good accordance with the standard  $\text{Fe}_2\text{O}_3$  (PDF Card No.39-1346) and  $\text{MnFe}_2\text{O}_4$  (PDF Card No.10-0319).

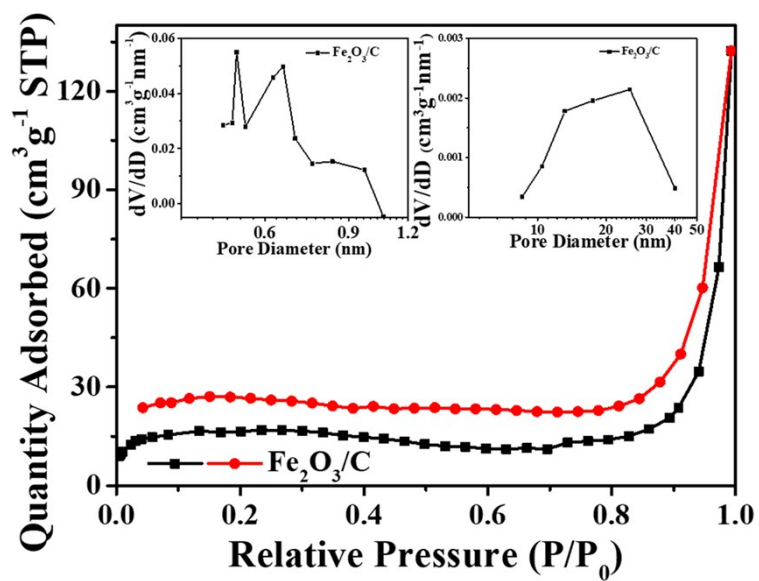

**Fig. S2** N<sub>2</sub> adsorption/desorption isothermal curves and the pore distribution (the insert) of Fe<sub>2</sub>O<sub>3</sub>/C composite. The specific surface area of ~55.4 m<sup>2</sup> g<sup>-1</sup> can be detected with the existence of mesopores (pore size centered at ~12-27 nm) and micropores (pore size centered at ~0.4-1.0 nm).

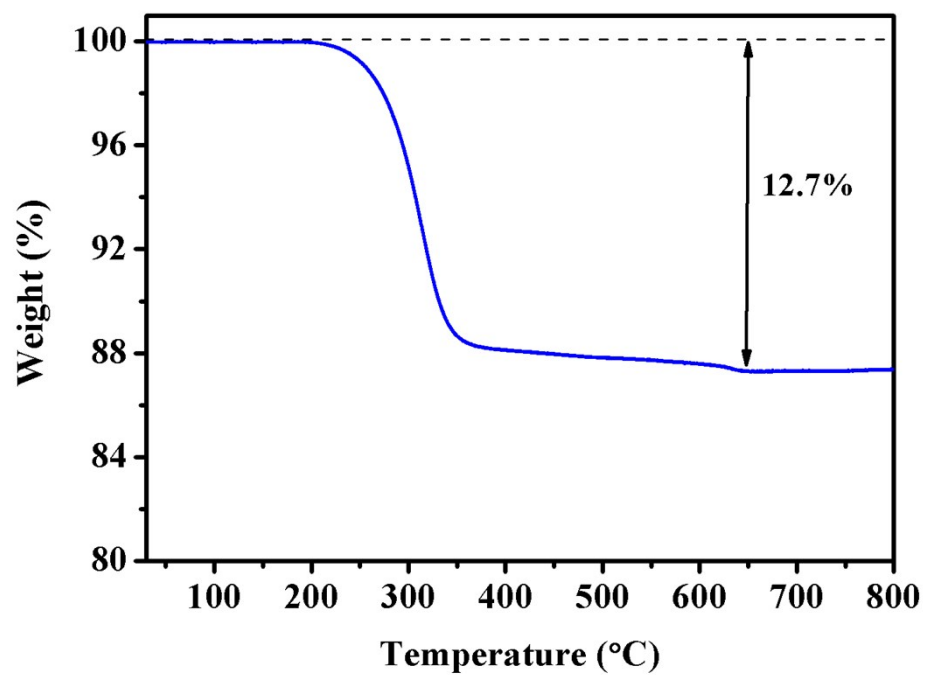

**Fig. S3** TGA curve of Fe-Mn-O/C in air atmosphere. The weight loss of 12.7 % between 200-700 °C should be assigned to the oxidation of carbon, indicating 12.7 % carbon in the Fe-Mn-O/C composite.

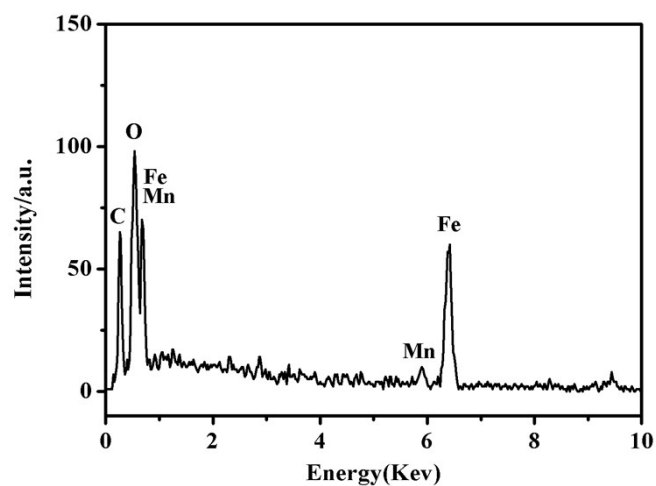

**Fig. S4** EDS spectrum of Fe-Mn-O/C. Four elements of Fe, Mn, O, and C can be detected with the molar ratios being 9:1:15:10. The content of C in the Fe-Mn-O/C composite can also be detected to be 12.6 %.

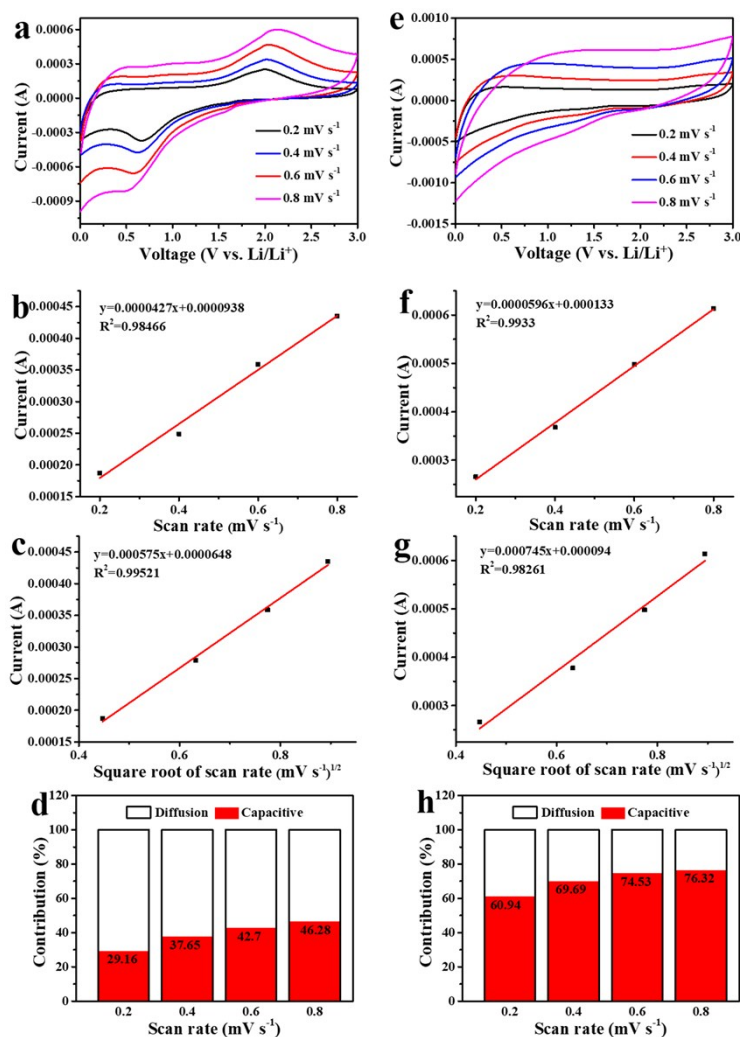

**Fig. S5** (a) CV curves of the as-synthesized Fe<sub>2</sub>O<sub>3</sub>/C electrode with different scan rates of 0.2, 0.4, 0.6, and 0.8 mV s<sup>-1</sup>. The linear fit of (b) peak currents vs. scan rate and (c) peak currents vs. square root of scan rate for the as-synthesized Fe<sub>2</sub>O<sub>3</sub>/C electrode. (d) Contribution ratio of capacitive and diffusion-controlled behaviors at different scan rates of as-prepared Fe<sub>2</sub>O<sub>3</sub>/C electrode. (e) CV curves of the cycled Fe<sub>2</sub>O<sub>3</sub>/C electrode after 200 cycles with different scan rates of 0.2, 0.4, 0.6, and 0.8 mV s<sup>-1</sup>. The linear fit of (f) peak currents vs. scan rate and (g) peak currents vs. square root of scan rate for the cycled Fe<sub>2</sub>O<sub>3</sub>/C electrode after 200 cycles. (h) Contribution ratio of capacitive and diffusion-controlled behaviors at different scan rates of cycled Fe<sub>2</sub>O<sub>3</sub>/C electrode after 200 cycles.

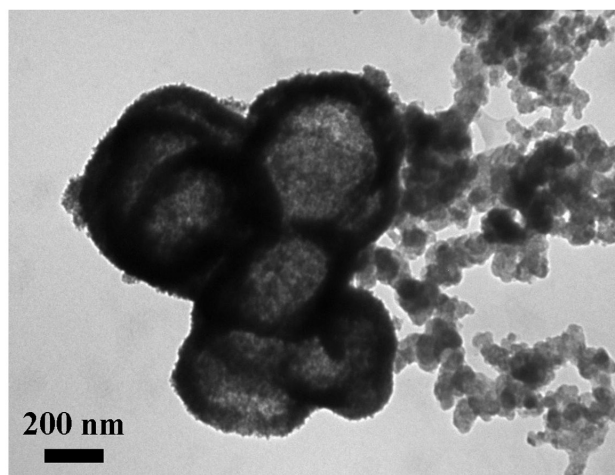

**Fig. S6** TEM image of the Fe-Mn-O/C electrode after 200 cycles. The sustainably retained hollow nanosphere morphology of the Fe-Mn-O/C electrode can be detected after cycling.

**Table S1** Electrochemical properties of Fe-Mn-O/C of this work and previous related work derived from MOFs. (IRC: initial reversible capacity, mA h g<sup>-1</sup>; RRC: retained reversible capacity, mA h g<sup>-1</sup>; CN: cycle number; CD: current density, A g<sup>-1</sup>; V: voltage, V)

| Composite                                                         | Morphology                       | IRC   | RRC/CN   | CD  | V         | References |
|-------------------------------------------------------------------|----------------------------------|-------|----------|-----|-----------|------------|
| Fe <sub>2</sub> O <sub>3</sub> -Mn <sub>3</sub> O <sub>4</sub> -C | Hollow nanosphere                | 837   | 1294/200 | 0.1 | 0.005-3.0 | This work  |
| Fe <sub>2</sub> O <sub>3</sub>                                    | Nanocube                         | ~850  | ~800/50  | 0.2 | 0.05-3.0  | 1          |
| Fe <sub>2</sub> O <sub>3</sub>                                    | Microbox                         | 917   | ~630/30  | 0.2 | 0.05-3.0  | 2          |
| Fe <sub>2</sub> O <sub>3</sub>                                    | Nanospindle                      | ~1024 | ~920/40  | 0.1 | 0.005-3.0 | 3          |
| Fe <sub>2</sub> O <sub>3</sub>                                    | Hierarchical microbox            | ~945  | ~920/30  | 0.2 | 0.01-3.0  | 4          |
| Fe <sub>2</sub> O <sub>3</sub>                                    | Nanospindle                      | 940   | 911/50   | 0.2 | 0.01-3.0  | 5          |
| Fe <sub>2</sub> O <sub>3</sub>                                    | Yolk-shell octahedron            | 1060  | 1176/200 | 0.1 | 0.005-3.0 | 6          |
| Fe <sub>2</sub> O <sub>3</sub>                                    | Microcube                        | ~1420 | ~608/50  | 0.1 | 0.05-3.0  | 7          |
| Fe <sub>2</sub> O <sub>3</sub> @N-doped C                         | Hollow nanosphere                | 1368  | 1573/50  | 0.1 | 0.01-3.0  | 8          |
| Fe <sub>2</sub> O <sub>3</sub> /graphene                          | Nanoparticle in graphene aerogel | ~1174 | 1129/130 | 0.2 | 0.01-3.0  | 9          |
| Fe <sub>2</sub> O <sub>3</sub> @graphene                          | Hollow nanosphere                | ~950  | ~833/100 | 1   | 0.01-3.0  | 10         |
| Mn <sub>3</sub> O <sub>4</sub> /C                                 | Sponge network                   | 722   | 770/100  | 0.2 | 0.005-2.5 | 11         |
| Mn <sub>3</sub> O <sub>4</sub> /C                                 | Microsphere                      | 1205  | 1032/500 | 0.2 | 0.01-3.0  | 12         |

#### References:

- 1 L. Zhang, H. B. Wu, R. Xu, and X. W. Lou, *CrystEngComm*, 2013, **15**, 9332-9335..
- 2 L. Zhang, H. B. Wu, and X. W. Lou, *J. Am. Chem. Soc.*, 2013, **135**, 10664-10672.
- 3 A. Banerjee, V. Aravindan, S. Bhatnagar, D. Mhamane, S. Madhavi and S. Ogale, *Nano Energy*, 2013, **2**, 890-896.
- 4 L. Zhang, H. B. Wu, S. Madhavi, H. H. Hng, and X. W. Lou, *J. Am. Chem. Soc.*, 2012, **134**, 17388-17391.
- 5 X. Xu, R. Cao, S. Jeong, and J. Cho, *Nano Lett*, 2012, **12**, 4988-4991..
- 6 W. X. Guo, W. W. Sun, L. P. Lv, S. F. Kong, and Y. Wang, *ACS Nano*, 2017, **11**, 4198-4205.
- 7 M. Li, W. Wang, M. Yang, F. Lv, L. Cao, Y. Tang, R. Sun, and Z. Lu, *RSC Adv.*, 2015, **5**, 7356-7362.
- 8 F. Zheng, M. He, Y. Yang, and Q. Chen, *Nanoscale*, 2015, **7**, 3410-3417.
- 9 T. Jiang, F. Bu, X. Feng, I. Shakir, G. Hao, and Y. Xu, *ACS Nano*, 2017, **11**, 5140-5147.
- 10 J. Hu, J. Zheng, L. Tian, Y. Duan, L. Lin, S. Cui, H. Peng, T. Liu, H. Guo, X. Wang, and F. Pan, *Chem. Commun.*, 2015, **51**, 7855-7858.
- 11 B. Sambandam, V. Soundharrajan, J. J. Song, S. Kim, J. Jo, D. P. Tung, S. Kim, V. Mathew, and J. Kim, *Inorg. Chem. Front.*, 2016, **3**, 1609-1615.
- 12 H. J. Peng, G. X. Hao, Z. H. Chu, J. Lin, X. M. Lin, and Y. P. Cai, *Cryst. Growth Des.*, 2017, **17**, 5881-5886.
